# Supplementary material for: A scalable, ecofriendly, and cost-effective lithium metal protection layer from a Post-it note
Source: Royal Society of Chemistry journal article supplement (doi:10.1039/d1ra08310d), 2021-12-21
Supplement: d1ra08310d1.pdf [file d1ra08310d1.pdf]

Supplementary Information to

**A scalable, ecofriendly, and cost-effective lithium metal protection layer from a Post-it note**

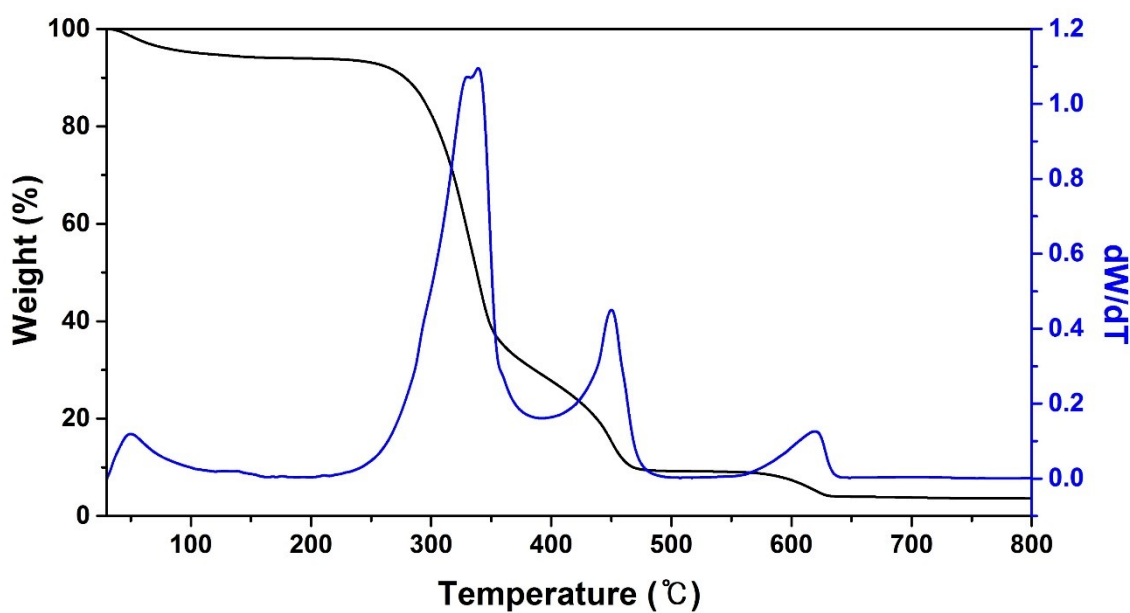

**Fig. S1.** Thermogravimetric analysis of the Post-it note under air atmosphere and its differential weight-change curve.

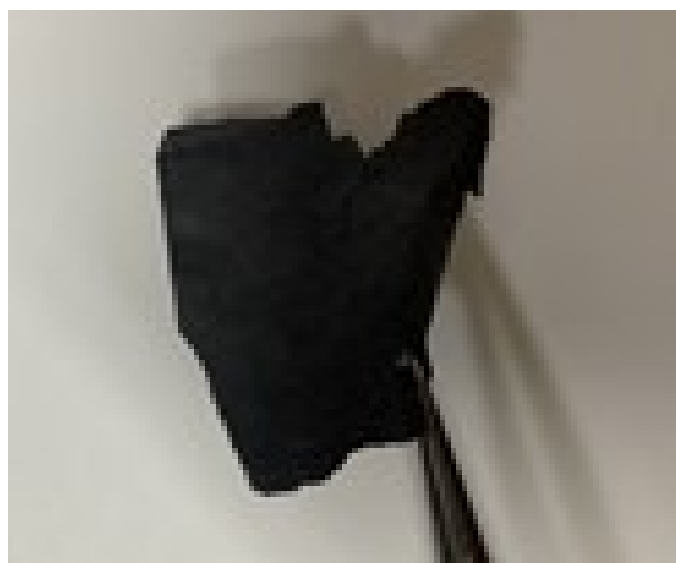

**Fig. S2.** Photograph of free-standing carbonized Post-it note

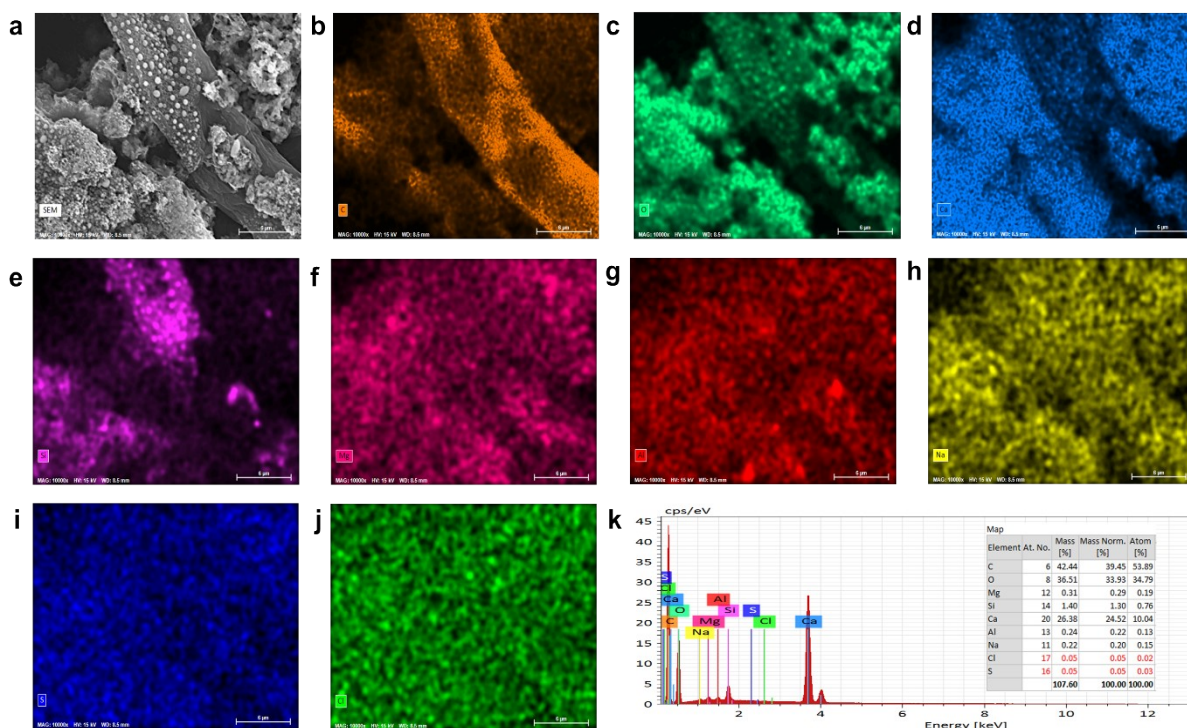

**Fig. S3.** (a) FE-SEM image of carbonized Post-it note and its energy dispersive X-ray spectrometry (EDS): elemental mapping images of (b) C, (c) O, (d) Ca, (e) Si (f) Mg, (g) Al, (h) Na, (i) S, (j) Cl, and (k) EDS spectrum (weight and atom % inset).

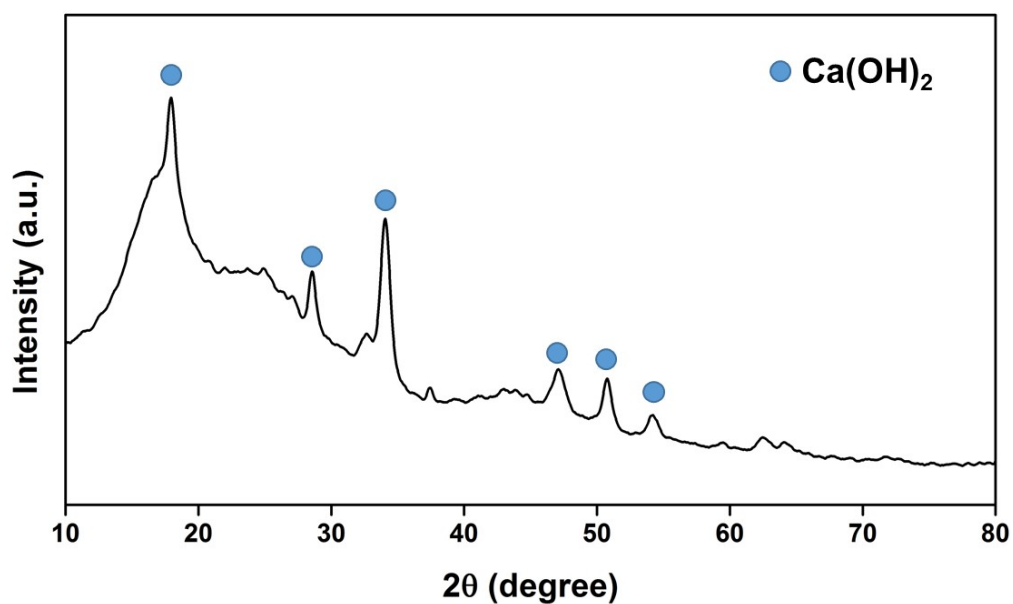

**Fig. S3.** X-ray diffractogram curve of the as-received Post-it note.

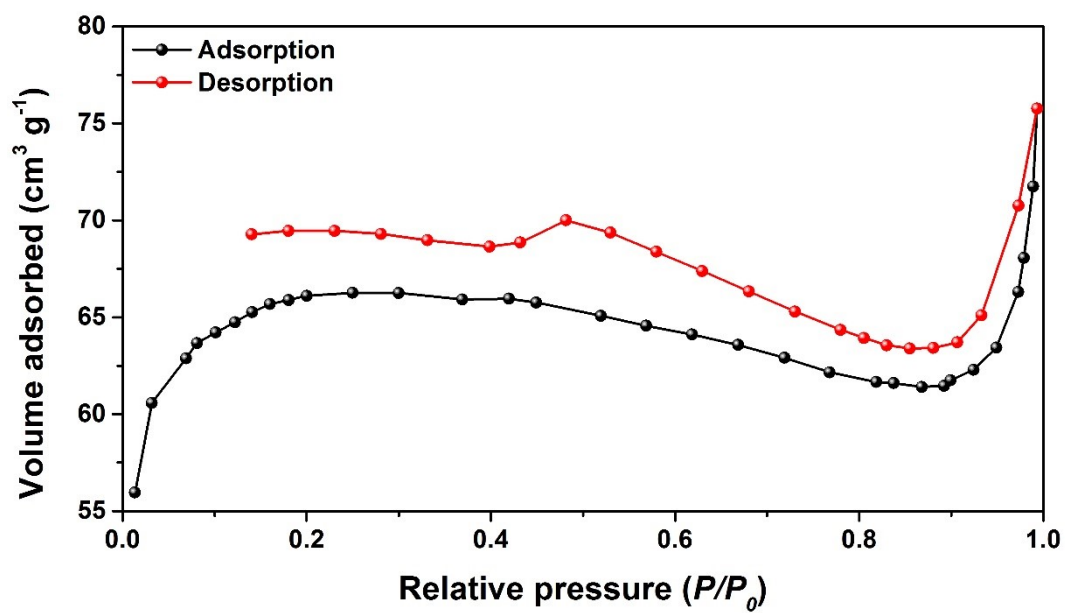

**Fig. S4.** Nitrogen adsorption/desorption isotherms at 77 K of the carbonized Post-it note.

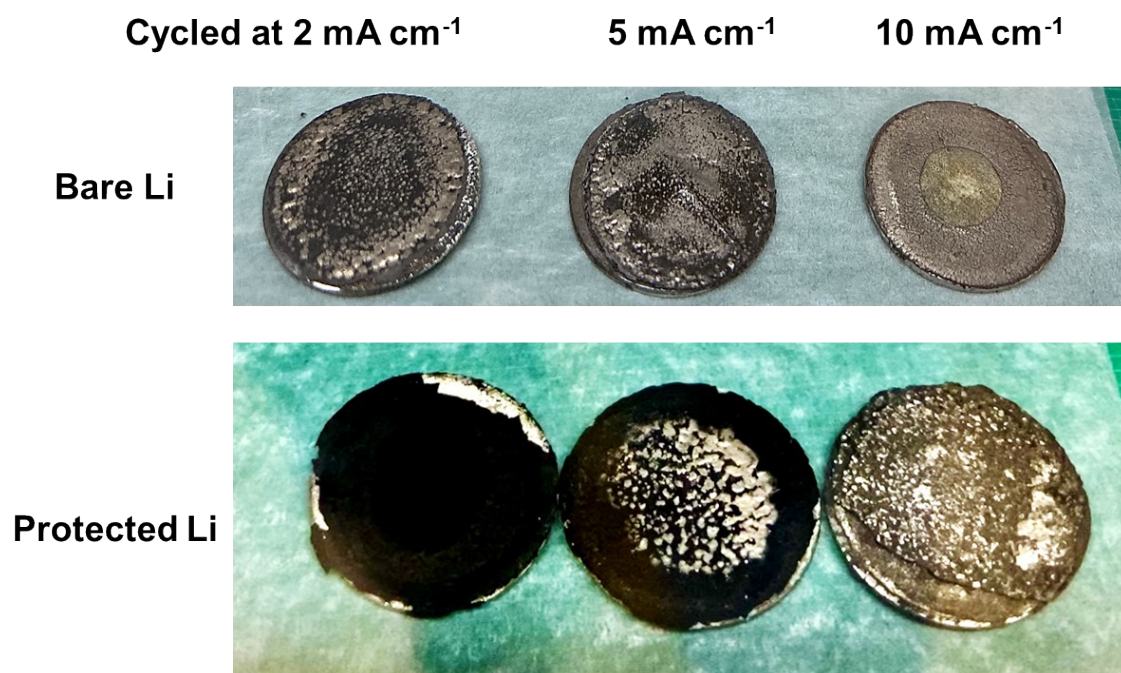

**Fig. S5.** Photographs of the bare Li and protected Li surfaces after symmetric cell cycling tests at various current densities.

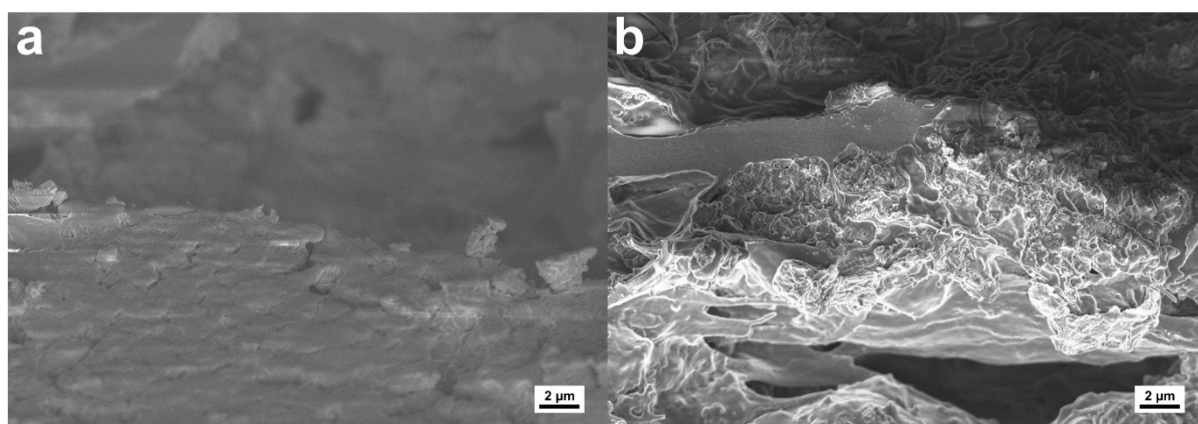

**Fig. S6** Scanning electron microscope images of (a) the protected Li surface and (b) cross-section of the protection layer after 5000<sup>th</sup> cycles. The current density was  $10 \text{ mA cm}^{-1}$ , the areal capacity was  $1 \text{ mAh cm}^{-1}$ .

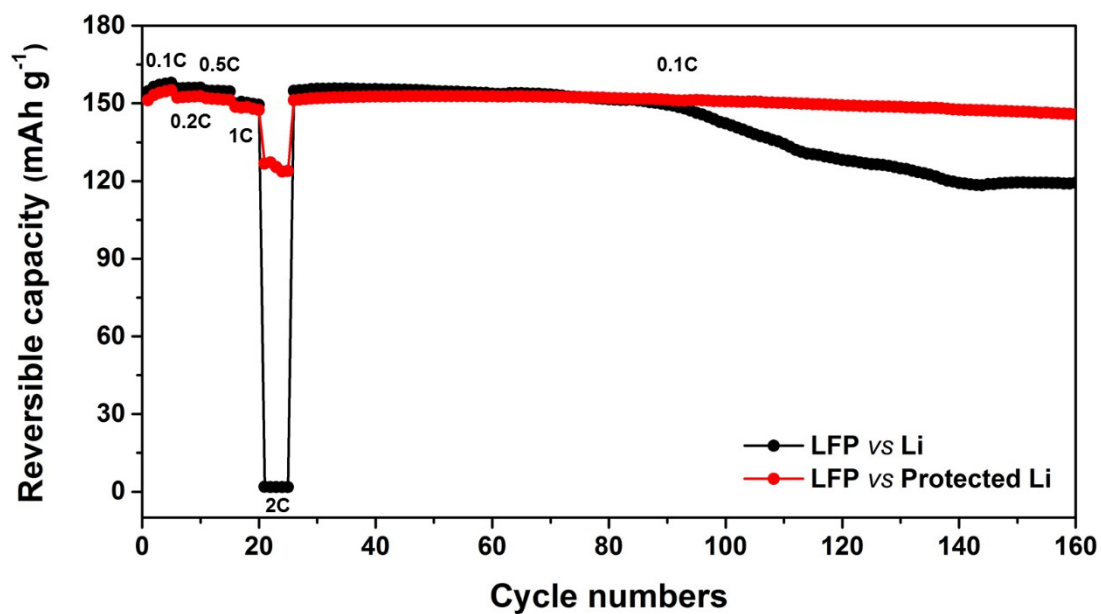

**Fig. S7.** Rate capabilities at charging current densities of 0.1C, 0.2C, 0.5C, 1C, 2C, and 0.1C.

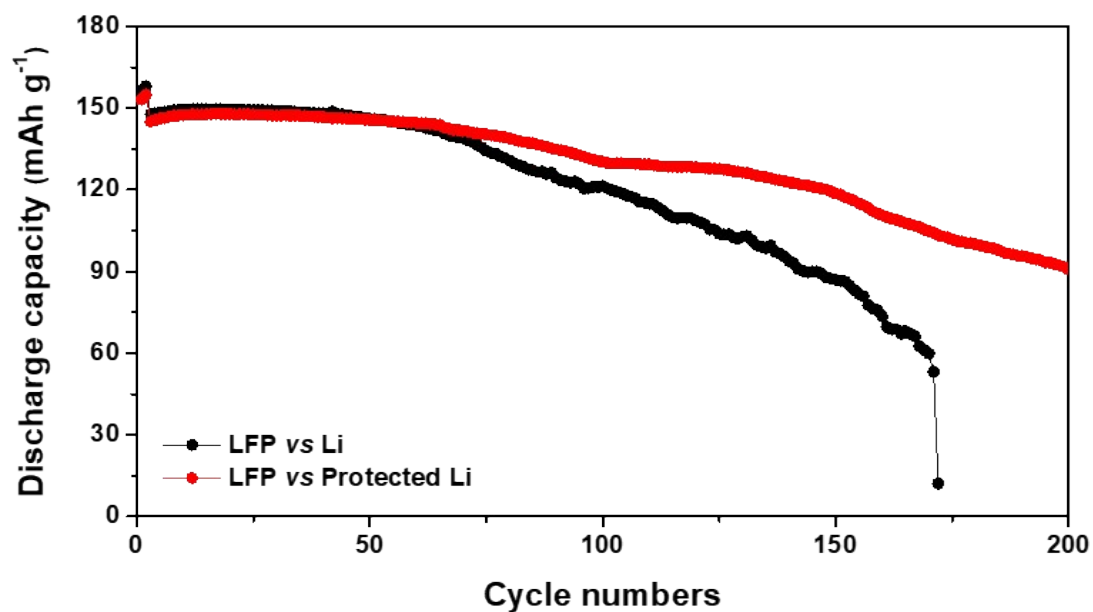

**Fig. S8.** Discharge capacity curves of the LFP||bare Li and LFP||bare Li full cells at the current density of 0.5C.
